# Supplementary material for: Repurposing of Ciclopirox to Overcome the Limitations of Zidovudine (Azidothymidine) against Multidrug-Resistant Gram-Negative Bacteria
Source: MDPI journal article supplement (doi:10.3390/pharmaceutics14030552), 2022-03-01
Supplement: s1 [file s1]

# Supplementary Materials: Repurposing of Ciclopirox to Overcome the Limitations of Zidovudine (Azidothymidine) against Multidrug-Resistant Gram-negative Bacteria

Hyejin Cho and Kwang-sun Kim

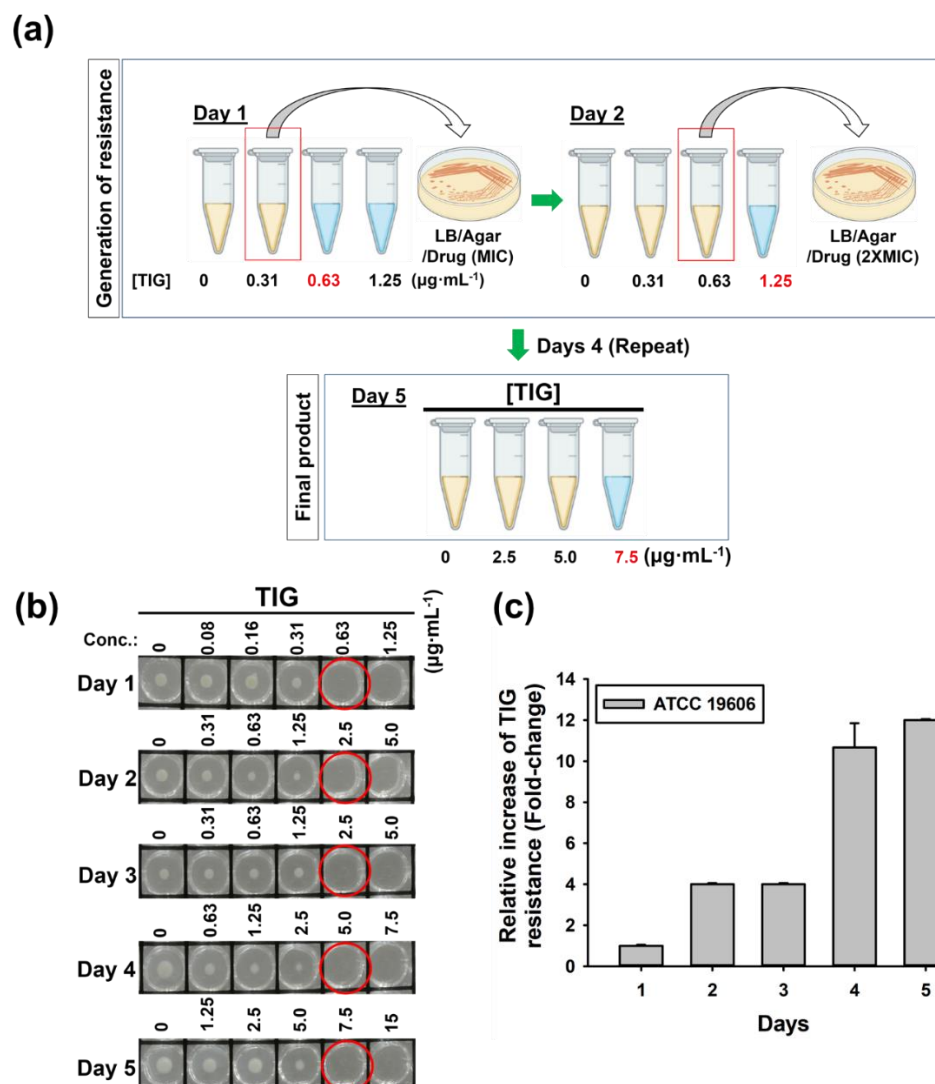

**Figure S1.** Generation of resistance phenotype by tigecycline (TIG). (a) Schematic representation of resistance generation method. (b) MIC values of TIG. One of the representative data from  $n = 3$  was shown. (c) Relative increase of TIG resistance. The relative increase of resistance as a fold change to non-drug treated ATCC 25922 cells (set to 1) were calculated based on MIC changes from (b). The values shown in the graph at indicated days were averaged values from  $n = 3$  with standard deviation ( $p < 0.05$ ). The 96-well plates were imaged with digital camera (Samsung NX200, Suwon, Korea).

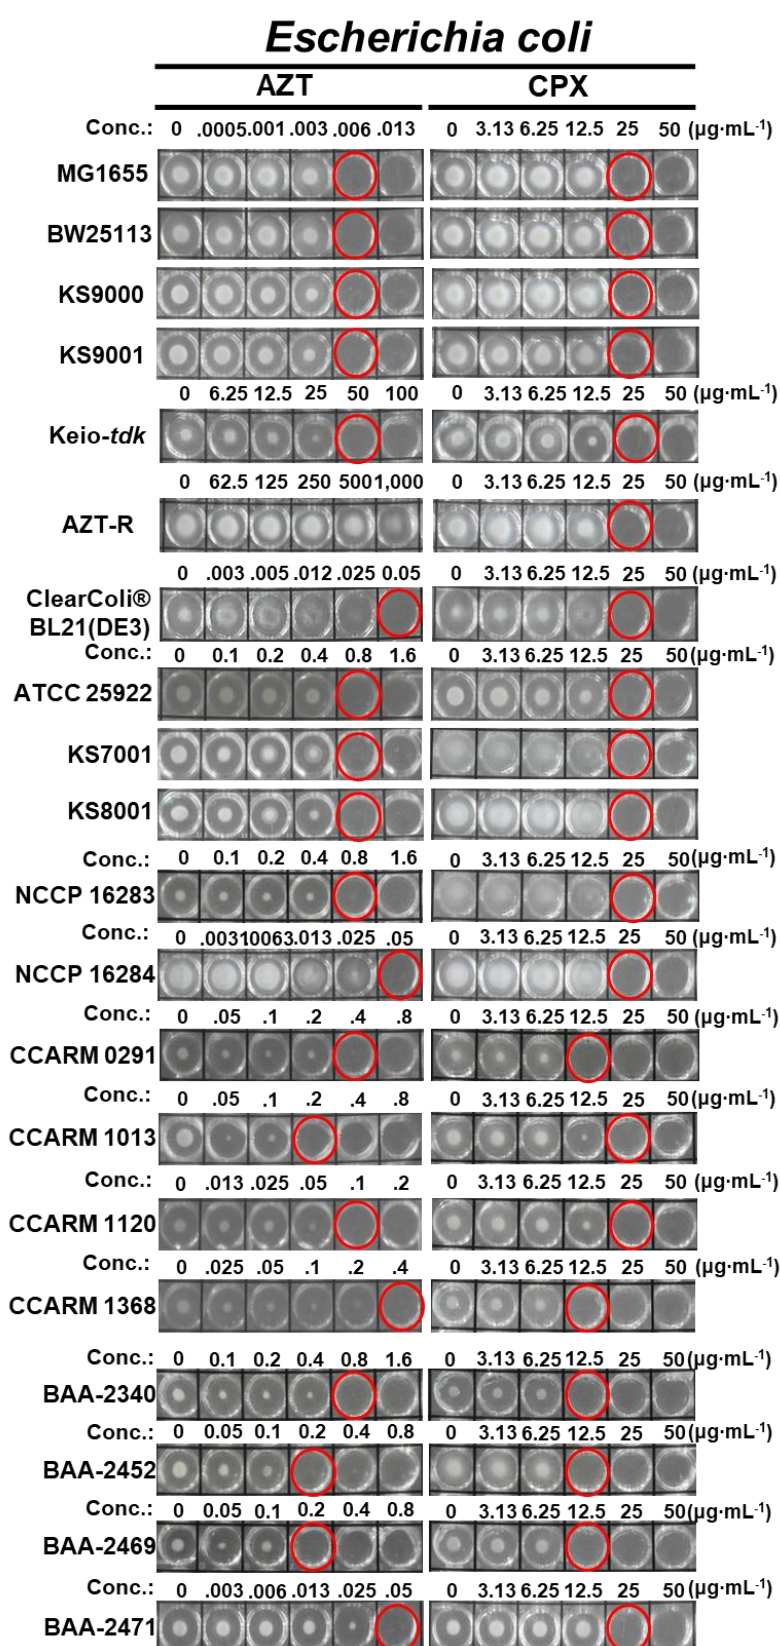

**Figure S2.** MIC determination of AZT and CPX against *E. coli* strains. MIC for individual strains was indicated by red circle. One of the representative data from  $n = 3$  was shown. The 96-well plates were imaged with digital camera (Samsung NX200, Suwon, Korea).

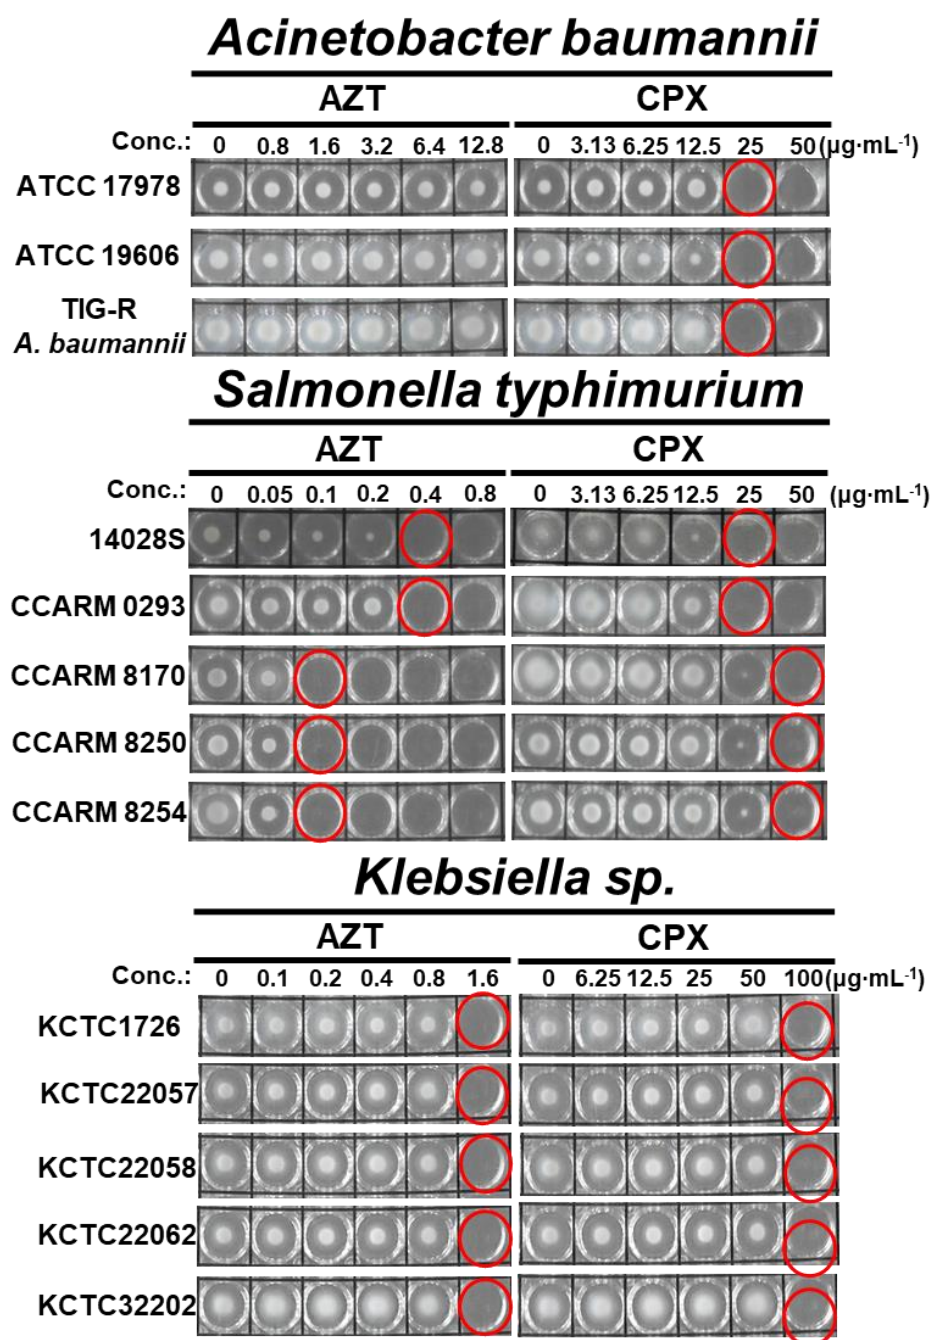

**Figure S3.** MIC determination of AZT and CPX against *A. Baumannii*, *Klebsiella sp.*, and *Salmonella typhimurium* strains. MIC for individual strains was indicated by red circle. One of the representative data from  $n = 3$  was shown. The 96-well plates were imaged with digital camera (Samsung NX200, Suwon, Korea).

(a) **ATCC25922** ATGGCACAGCTATATTTCTACTATTCCGCAATGAATGCGGGTAAGTCTACAGCATTG  
**BW25113** ATGGCACAGCTATATTTCTACTATTCCGCAATGAATGCGGGTAAGTCTACAGCATTG  
**ATCC25922** TTGCAATCTTCATACAATTACCAGGAACGCGGCATGCGCACTGTCGTATATACGGCA  
**BW25113** TTGCAATCTTCATACAATTACCAGGAACGCGGCATGCGCACTGTCGTATATACGGCA  
**ATCC25922** GAAATTGATGATCGCTTTGGTGCCGGGAAAGTCAGTTCGCGTATAGGTTTGTTCATCG  
**BW25113** GAAATTGATGATCGCTTTGGTGCCGGGAAAGTCAGTTCGCGTATAGGTTTGTTCATCG  
**ATCC25922** CCTGCAAAATTATTTAACCAAAATTCATCATTATTTGATGAGATTCGTGCGGAACAT  
**BW25113** CCTGCAAAATTATTTAACCAAAATTCATCATTATTTGATGAGATTCGTGCGGAACAT  
**ATCC25922** GAACAGCAGGCAATTCATTGCGTACTGGTTGATGAATGCCAGTTTTTAACCAGACAA  
**BW25113** GAACAGCAGGCAATTCATTGCGTACTGGTTGATGAATGCCAGTTTTTAACCAGACAA  
**ATCC25922** CAAGTATATGAATTATCGGAGGTTGTCGATCAACTCGATATACCCGTACTTTGTTAT  
**BW25113** CAAGTATATGAATTATCGGAGGTTGTCGATCAACTCGATATACCCGTACTTTGTTAT  
**ATCC25922** GGTTCACGTACCGATTTTCGAGGTGAATTATTTATTGGCAGTCAATACTTACTGGCG  
**BW25113** GGTTCACGTACCGATTTTCGAGGTGAATTATTTATTGGCAGCCAATACTTACTGGCA  
**ATCC25922** TGGTCCGACAACTGGTTGAATTAAAAACCATCTGTTTTTGTGGCCGTAAAGCAAGC  
**BW25113** TGGTCCGACAACTGGTTGAATTAAAAACCATCTGTTTTTGTGGCCGTAAAGCAAGC  
**ATCC25922** ATGGTGCTGCGTCTTGATCAAGCAGGCAGACCTTATAACGAAGGTGAGCAGGTGGTT  
**BW25113** ATGGTGCTGCGTCTTGATCAAGCAGGCAGACCTTATAACGAAGGTGAGCAGGTGGTA  
**ATCC25922** ATTGGTGGTAATGAACGCTACGTTTCTGTATGCCGTAAACACTATAAAGAAGCGTTA  
**BW25113** ATTGGTGGTAATGAACGATACGTTTCTGTATGCCGTAAACACTATAAAGAAGCGTTA  
**ATCC25922** GAAGTCGCTCATTAAACGGCTATTTCAGGAAAGGCATCGCCACGATTAA  
**BW25113** CAAGTCGATCATTAAACGGCTATTTCAGGAAAGGCATCGCCACGATTAA

(b) **ATCC25922** MAQLYFYYSAMNAGKSTALLQSSYNYQERGMRTVVYTAEIDDRFGAGKVSSRIGLSS  
**BW25113** MAQLYFYYSAMNAGKSTALLQSSYNYQERGMRTVVYTAEIDDRFGAGKVSSRIGLSS  
**ATCC25922** PAKLFNQNSSLFDEIRAEHEQQAIIHCVLVDECQFLTRQQVYELSEVVDQLDIPVLCY  
**BW25113** PAKLFNQNSSLFDEIRAEHEQQAIIHCVLVDECQFLTRQQVYELSEVVDQLDIPVLCY  
**ATCC25922** GLRTDFRGELFIGSQYLLAWSDKLVLEKTCFCGRKASMLRLDQAGRPYNEGEQVV  
**BW25113** GLRTDFRGELFIGSQYLLAWSDKLVLEKTCFCGRKASMLRLDQAGRPYNEGEQVV  
**ATCC25922** IGGNERYVSVC RKHYKEALVGS LTAIQERHRHD\*  
**BW25113** IGGNERYVSVC RKHYKEALQVDSLTAIQERHRHD\*

**Figure S4.** Sequence alignment of Tdk encoding genes from *E. coli* ATCC 25922 and BW25113 strains. Results of (a) DNA or (b) amino acid sequence alignments of ATCC 25922 and BW25113 strains using Clustal Omega (ClustalW2, v2.1, <http://www.clustal.org>; accessed on 1 March 2022). Nucleotides in red were indicated different positions in two strains.



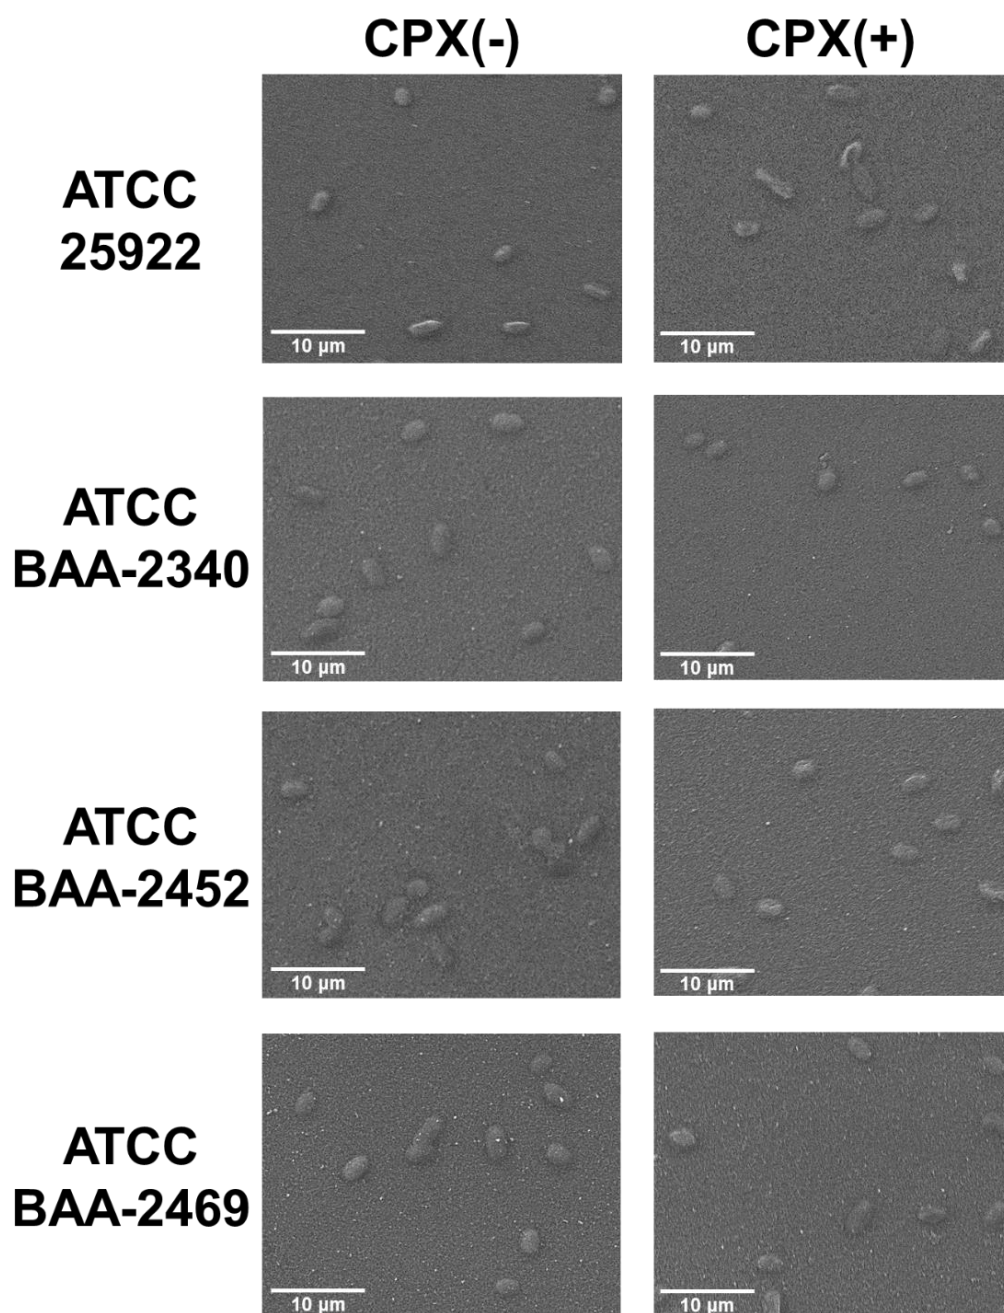

**Figure S5.** Morphological analysis. *E. coli* ATCC25922, ATCC BAA-2340, -2452, and -2469 cells with (+) or without (−) CPX at a sublethal concentration ( $6.25 \mu\text{g} \cdot \text{mL}^{-1}$ ). Scanning Electron Microscopy (SEM) images. The same cells were imaged using Scanning Electron Microscopy (TESCAN, Fuveau, France). One representative from  $n = 3$  was shown.

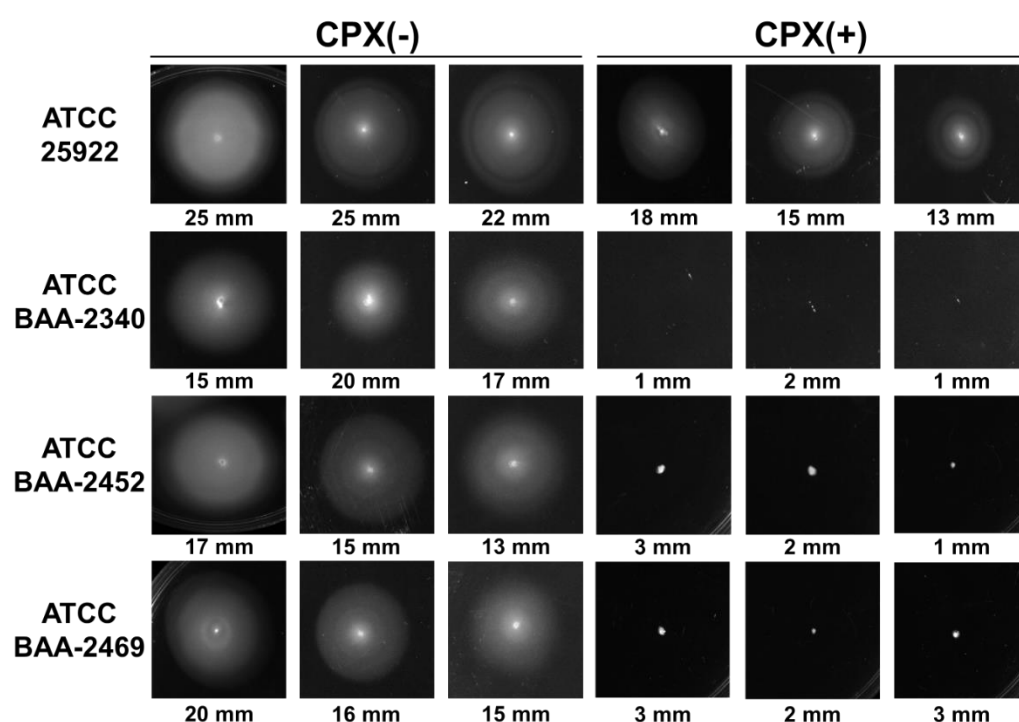

**Figure S6.** Motility assays. Swimming motility of *E. coli* ATCC 25922, ATCC BAA-2340, -2452, and -2469 cells with (+) or without (−) CPX at a sublethal concentration ( $6.25 \mu\text{g}\cdot\text{mL}^{-1}$ ) was analyzed. Images of agar plates from triplicate experiments were captured by Image Lab™ Software (ver 5.2.1; Bio-Rad, Hercules, CA, USA) and averaged values with standard deviations were shown in Table 2. The diameter of grown bacterial cells on the plates were measured by a transparent ruler and was indicated.

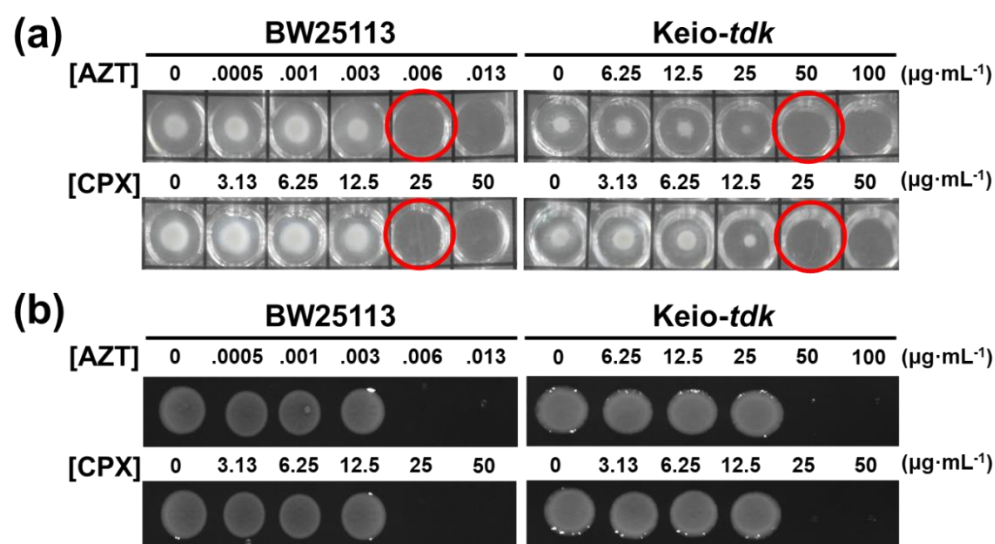

**Figure S7.** AZT and CPX activity against *tdk* knockout *E. coli* cells. (a) Determination of MIC and (b) bactericidal activity of AZT and CPX against *tdk* knockout (Keio-*tdk*) cells (Table 1). BW25113 was used as a control strain. Data shown here is one representative from  $n = 3$ . The 96-well and LB agar plates were imaged with digital camera (Samsung NX200, Suwon, Korea). One representative from triplicate experiments was shown. Red circles indicate MIC value for individual drugs.
